# Supplementary material for: Successful treatment of severe sepsis and diarrhea after vagotomy utilizing fecal microbiota transplantation: a case report
Source: PubMed Central journal article supplement (PMC4346118; doi:10.1186/s13054-015-0738-7), 2015-02-09

**Additional file 5 Variations in phylogenetic distribution of 16S rDNA sequences following fecal infusion.** The diagrammatic phylogenetic tree presents a summary of the rRNA sequences obtained from DGGE bands in this study. Phyla are named to the left of the tree and lower taxonomic levels to the right. The number of taxa in a clade is designated as the relative proportion (%) in the whole fecal microbiota. Donor, -1 day, 1 day, 7 days, 14 days, and 21 days indicate the samples of the donor, 1 day before fecal transplantation, and 1, 7, 14 as well as 21 days after the treatment, respectively.

Donor

-1 day

1 day

7 days

14 days

21 days

Proteobacteria

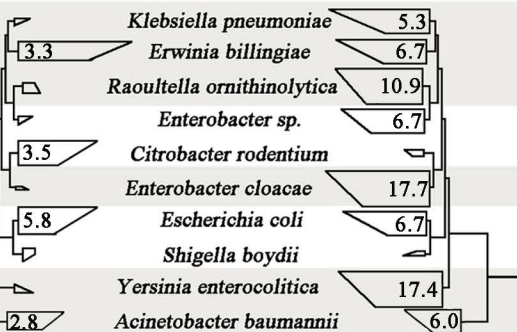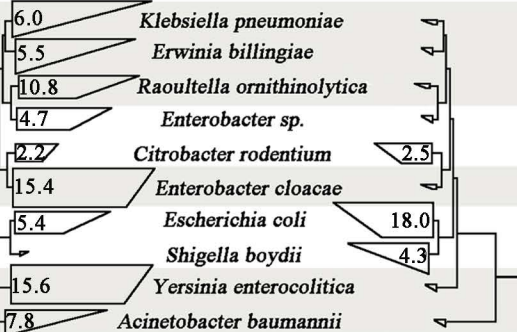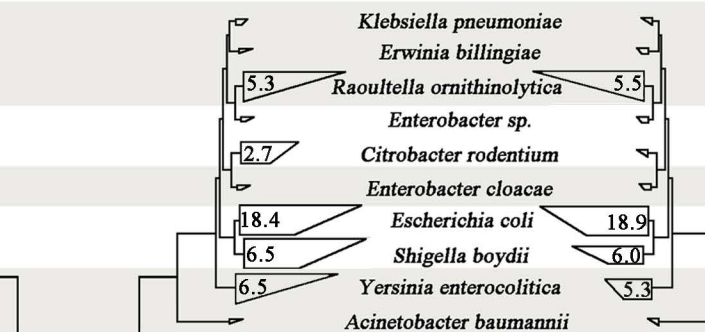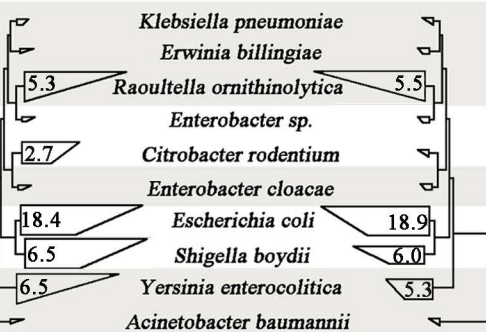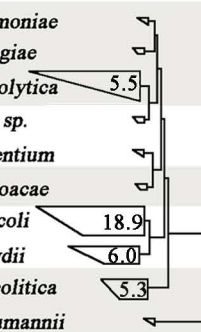

Firmicutes

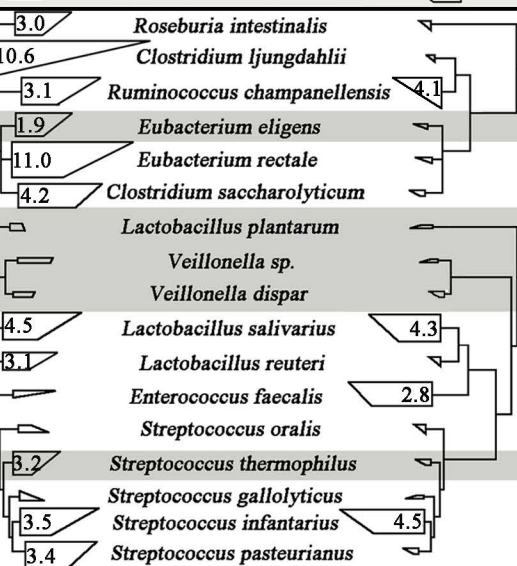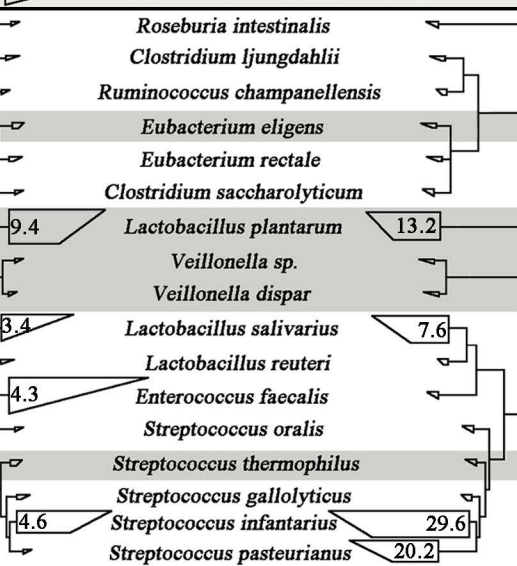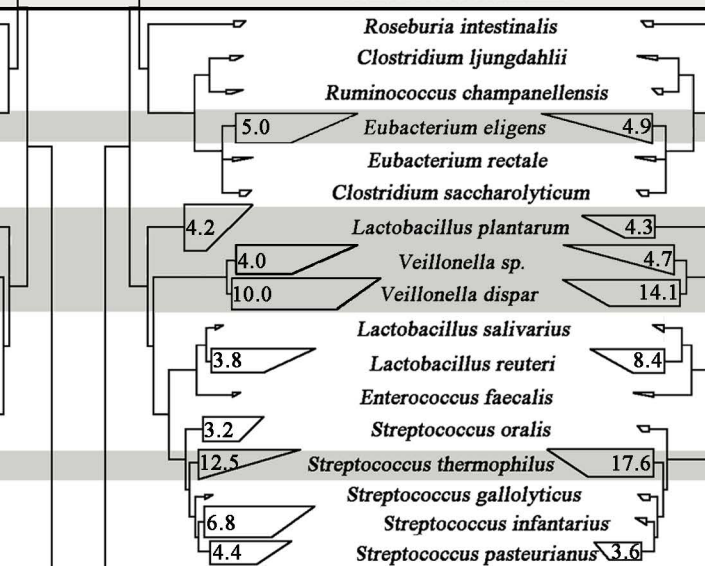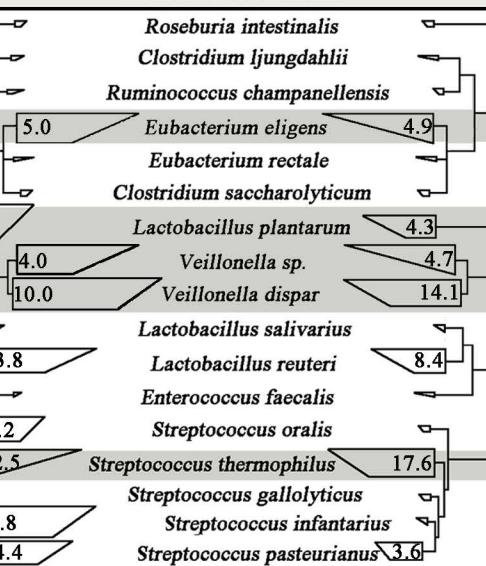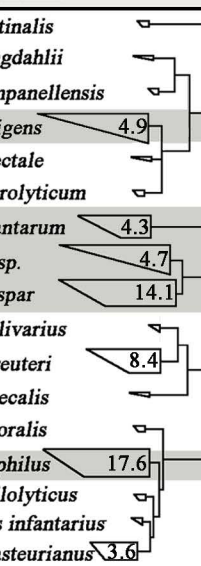

Bacteroidetes

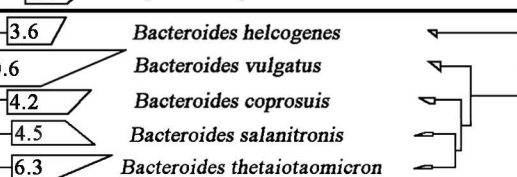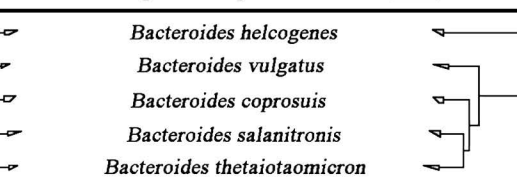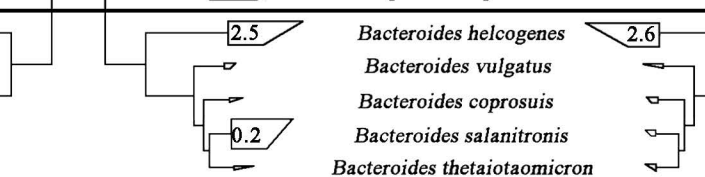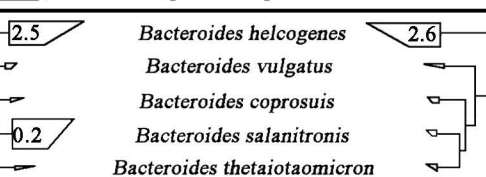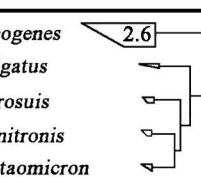

Supplement: 13054_2015_738_MOESM5_ESM.pdf [file 13054_2015_738_MOESM5_ESM.pdf]
