# Supplementary material for: Successful treatment of severe sepsis and diarrhea after vagotomy utilizing fecal microbiota transplantation: a case report
Source: PubMed Central journal article supplement (PMC4346118; doi:10.1186/s13054-015-0738-7), 2015-02-09

**Additional file 2 Computed tomographic scan of the abdomen.** Representative images are selected to show intraabdominal free fluid and abscesses.

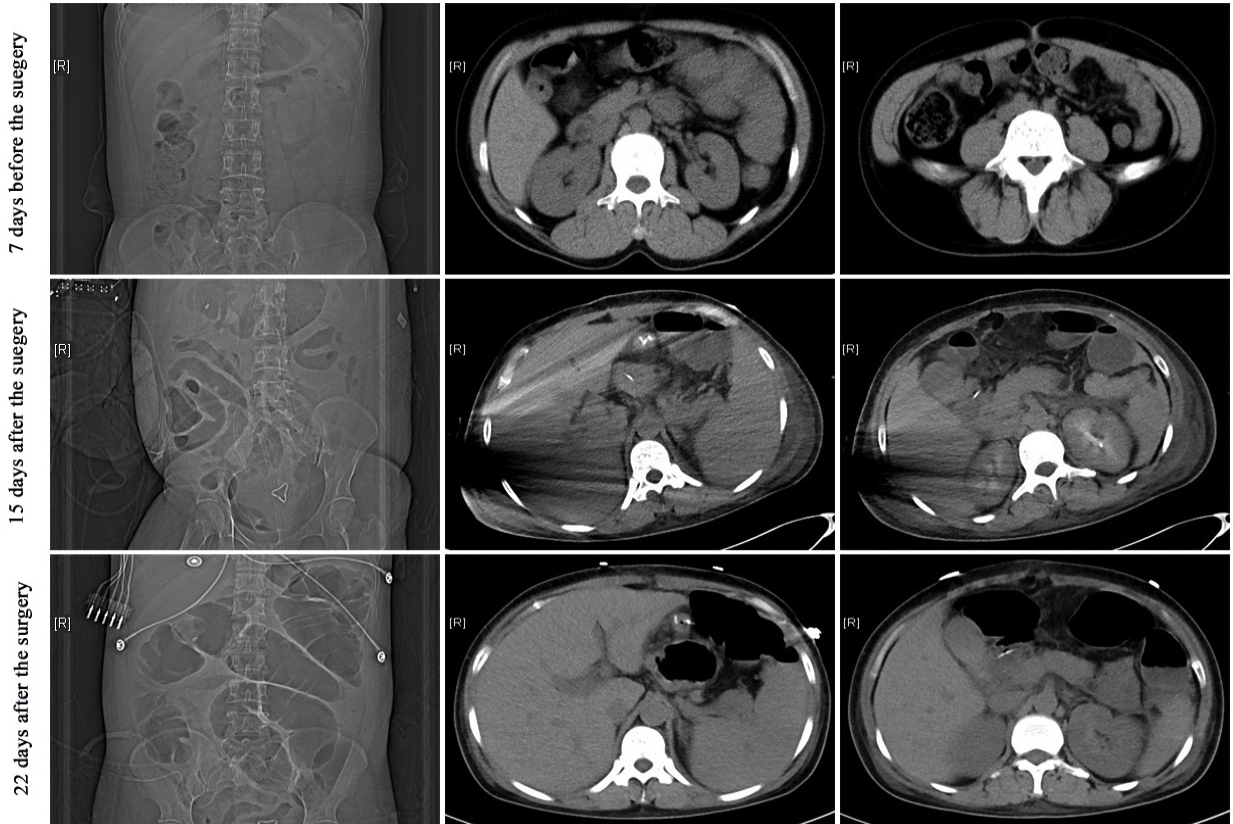

Supplement: 13054_2015_738_MOESM2_ESM.pdf [file 13054_2015_738_MOESM2_ESM.pdf]
