# Supplementary material for: Successful treatment of severe sepsis and diarrhea after vagotomy utilizing fecal microbiota transplantation: a case report
Source: PubMed Central journal article supplement (PMC4346118; doi:10.1186/s13054-015-0738-7), 2015-02-09
Supplement: 13054_2015_738_MOESM4_ESM.pdf [file 13054_2015_738_MOESM4_ESM.pdf]

**Additional file 4 The sequence analysis of DGGE bands from the feces**

| <b>Band</b> | <b>Closest relative</b>             | <b>Strain</b>                   | <b>GenBank accession</b> | <b>Identity (%)</b> |
|-------------|-------------------------------------|---------------------------------|--------------------------|---------------------|
| 1           | <i>Citrobacter rodentium</i>        | ICC168                          | NC_013716.1              | 97                  |
| 2           | <i>Bacteroides vulgatus</i>         | ATCC 8482                       | NC_009614.1              | 99                  |
| 3           | <i>Bacteroides helcogenes</i>       | P 36-108                        | NC_014933.1              | 96                  |
| 4           | <i>Bacteroides salanitronis</i>     | DSM 18170                       | NC_015164.1              | 97                  |
| 5           | <i>Lactobacillus plantarum</i>      | WCFS1                           | NC_004567.2              | 99                  |
| 6           | <i>Bacteroides thetaiotaomicron</i> | VPI-5482                        | NC_004663.1              | 97                  |
| 7           | <i>Bacteroides coprosuis</i>        | DSM 18011                       | NZ_CM001167.1            | 98                  |
| 8           | <i>Acinetobacter baumannii</i>      | MDR-TJ                          | NC_017847.1              | 97                  |
| 9           | <i>Veillonella sp.</i>              | F0412                           | NZ_AENU01000007.1        | 99                  |
| 10          | <i>Lactobacillus salivarius</i>     | UCC118                          | NC_007929.1              | 96                  |
| 11          | <i>Eubacterium eligens</i>          | ATCC 27750                      | NC_012778.1              | 100                 |
| 12          | <i>Streptococcus gallolyticus</i>   | UCN34                           | NC_013798.1              | 99                  |
| 13          | <i>Enterococcus faecalis</i>        | OG1RF                           | NC_017316.1              | 99                  |
| 14          | <i>Eubacterium rectale</i>          | ATCC 33656                      | NC_012781.1              | 99                  |
| 15          | <i>Streptococcus oralis</i>         | Uo5                             | NC_015291.1              | 98                  |
| 16          | <i>Roseburia intestinalis</i>       | XB6B4                           | NC_021012.1              | 97                  |
| 17          | <i>Streptococcus infantarius</i>    | CJ18                            | NC_016826.1              | 99                  |
| 18          | <i>Streptococcus pasteurianus</i>   | ATCC 43144                      | NC_015600.1              | 99                  |
| 19          | <i>Klebsiella pneumoniae</i>        | MGH 78578                       | NC_009648.1              | 99                  |
| 20          | <i>Clostridium ljungdahlii</i>      | DSM 13528                       | NC_014328.1              | 98                  |
| 21          | <i>Erwinia billingiae</i>           | Eb661                           | NC_014306.1              | 97                  |
| 22          | <i>Clostridium saccharolyticum</i>  | WM1                             | NC_014376.1              | 97                  |
| 23          | <i>Raoultella ornithinolytica</i>   | B6                              | NC_021066.1              | 99                  |
| 24          | <i>Ruminococcus champanellensis</i> | 18P13                           | NC_021039.1              | 96                  |
| 25          | <i>Streptococcus thermophilus</i>   | CNRZ1066                        | NC_006449.1              | 99                  |
| 26          | <i>Yersinia enterocolitica</i>      | subsp. palearctica<br>105.5R(r) | NC_015224.1              | 97                  |
| 27          | <i>Escherichia coli</i>             | UMN026                          | NC_011751.1              | 100                 |
| 28          | <i>Shigella boydii</i>              | CDC 3083-94                     | NC_011740.1              | 100                 |
| 29          | <i>Enterobacter cloacae</i>         | SCF1                            | NC_014618.1              | 99                  |
| 30          | <i>Lactobacillus reuteri</i>        | DSM 20016                       | NC_009513.1              | 97                  |
| 31          | <i>Enterobacter sp.</i>             | 638                             | NC_009436.1              | 96                  |
| 32          | <i>Veillonella dispar</i>           | ATCC 17748                      | NZ_ACIK02000004.1        | 99                  |
