# Supplementary material for: Successful treatment of severe sepsis and diarrhea after vagotomy utilizing fecal microbiota transplantation: a case report
Source: Springer Nature journal article supplement (doi:10.1186/s13054-015-0738-7), 2015-01-30
Supplement: MOESM1 [file 9780086]

## Additional file 1 Clinical characteristic and laboratory parameters of the patient

| Day of gastrectomy                         | 4                | 5                | 13                | 29                | 30               | 31               | 32               | 33               | 34               | 35               | 36               | 37               |
|--------------------------------------------|------------------|------------------|-------------------|-------------------|------------------|------------------|------------------|------------------|------------------|------------------|------------------|------------------|
| Day of fecal transplantation               | -26              | -25              | -17               | -1                | 0                | 1                | 2                | 3                | 4                | 5                | 6                | 7                |
| Temperature (°C)                           | 36.3-37.2        | 37.8-39.6        | 37.2-38.7         | 36.5-38.0         | 36.5-37.8        | 36.6-37.1        | 36.5-37.3        | 36.4-36.9        | 36.0-36.6        | 36.0-36.3        | 36.5-37.2        | 36.5-37.1        |
| Heart rate (bpm)                           | 96-126           | 89-145           | 86-118            | 73-91             | 76-112           | 74-92            | 76-89            | 79-88            | 76-89            | 76-86            | 81-100           | 76-93            |
| Respiratory rate (beats/min)               | 17-28            | 15-27            | 12-21             | 15-24             | 15-30            | 14-26            | 15-33            | 18-22            | 16-24            | 16-25            | 14-26            | 16-23            |
| Blood pressure (mmHg)                      | 60-122/<br>38-64 | 77-156/<br>52-80 | 118-160/<br>76-90 | 102-124/<br>54-71 | 97-125/<br>55-68 | 90-123/<br>50-75 | 94-125<br>/47-69 | 90-113/<br>54-67 | 93-119/<br>54-75 | 95-112/<br>53-72 | 93-114/<br>56-73 | 96-125/<br>56-71 |
| Blood oxygen saturation (%)                | 86-100           | 87-100           | 94-100            | 98-100            | 96-100           | 96-100           | 97-100           | 94-100           | 97-100           | 97-100           | 98-100           | 98-100           |
| pH                                         | 7.366            | 7.348            | 7.473             | 7.367             | 7.344            | 7.430            | 7.360            | 7.373            | 7.399            | 7.369            | 7.298            | 7.395            |
| PaO <sub>2</sub> (mmHg)                    | 67.4             | 83.3             | 57.0              | 77.2              | 118.0            | 147.0            | 116.0            | 93.7             | 138.0            | 91.7             | 142.0            | 110.0            |
| PaCO <sub>2</sub> (mmHg)                   | 26.2             | 29.6             | 36.2              | 31.8              | 30.3             | 30.0             | 32.8             | 26.8             | 28.2             | 29.0             | 23.1             | 26.0             |
| BE                                         | -9.2             | -8.3             | -7.2              | -6.2              | -8.2             | -4.0             | -6.2             | -8.6             | -6.3             | -7.6             | -4.1             | -7.9             |
| Lac (mmol/L)                               | 8.2              | 8.3              | 5.1               | 3.7               | 3.4              | 1.1              | 1.2              | 0.9              | 0.9              | 1.2              | 1.1              | 1.3              |
| C-reactive protein (mg/L)                  | 143.4            | 55.0             | 64.6              | 42.8              | 27.8             | 41.7             | n.d.             | 24.4             | n.d.             | 18.0             | 17.9             | n.d.             |
| Daily stool volume (mL)                    | 700              | 1800             | 2350              | 2470              | 2050             | 1980             | 1955             | 2920             | 3530             | 4020             | 2020             | 550              |
| <b>Hematological analysis</b>              |                  |                  |                   |                   |                  |                  |                  |                  |                  |                  |                  |                  |
| White blood cell count ( $\times 10^9/L$ ) | 2.9              | 7.9              | 18.0              | 6.8               | 9.4              | 6.6              | 6.5              | 7.7              | 8.7              | 6.9              | 6.4              | 6.5              |
| Neutrophil percentage (%)                  | 83               | 98               | 89                | 58                | 64               | 71               | 60               | 64               | 66               | 61               | 55               | 57               |
| Lymphocyte percentage (%)                  | 13               | 2                | 10                | 30                | 26               | 20               | 32               | 29               | 29               | 32               | 37               | 36               |

|                                          |      |        |      |      |      |      |      |      |      |      |      |      |
|------------------------------------------|------|--------|------|------|------|------|------|------|------|------|------|------|
| Platelet ( $\times 10^9/L$ )             | 138  | 62     | 76   | 280  | 281  | 273  | 281  | 272  | 294  | 299  | 309  | 312  |
| <b>Liver function</b>                    |      |        |      |      |      |      |      |      |      |      |      |      |
| Total protein (g/L)                      | 65.5 | 45.8   | 60.4 | 53.8 | 52.2 | 50.5 | 50.5 | 48.1 | 49.8 | 50.8 | 52.9 | 55.1 |
| Albumin (g/L)                            | 34.2 | 25.6   | 31.1 | 34.7 | 35.4 | 35.8 | 35.8 | 34.1 | 34.0 | 33.4 | 36.4 | 34.5 |
| Total bilirubin ( $\mu\text{mol/L}$ )    | 8.5  | 17.6   | 42.0 | 24.2 | 18.7 | 16.2 | 12.4 | 11.9 | 12.1 | 9.3  | 11.0 | 9.9  |
| Direct bilirubin ( $\mu\text{mol/L}$ )   | 0    | 15.5   | 29.6 | 9.9  | 6.8  | 6.3  | 3.5  | 4.3  | 4.5  | 2.2  | 3.7  | 0.7  |
| Indirect bilirubin ( $\mu\text{mol/L}$ ) | 8.5  | 2.1    | 12.4 | 14.4 | 12.0 | 9.9  | 8.9  | 7.6  | 6.7  | 7.1  | 7.3  | 9.2  |
| <b>Renal function</b>                    |      |        |      |      |      |      |      |      |      |      |      |      |
| Creatinine ( $\mu\text{mol/L}$ )         | 94   | 131    | 51   | 37   | 34   | 36   | 38   | 34   | 32   | 32   | 35   | 29   |
| Urea N (mmol/L)                          | 4.6  | 5.3    | 7.3  | 5.6  | 5.4  | 4.6  | 6.2  | 6.4  | 5.9  | 7.0  | 5.7  | 7.0  |
| Uric acid ( $\mu\text{mol/L}$ )          | 259  | 249    | 54   | 146  | 126  | 140  | 112  | 116  | 114  | 109  | 143  | 100  |
| <b>Blood coagulation test</b>            |      |        |      |      |      |      |      |      |      |      |      |      |
| Prothrombin time (s)                     | 17.6 | 24.5   | 14.1 | 13.9 | n.d. | 13.4 | 13.7 | 14.4 | 15.3 | n.d. | 14.0 | 14.2 |
| Partial thromboplastin time (s)          | 48.2 | >120.0 | 29.0 | 30.9 | n.d. | 32.1 | 34.6 | 33.6 | 37.2 | n.d. | 31.6 | 28.9 |
| International normalized ratio           | 1.52 | 2.11   | 1.22 | 1.21 | n.d. | 1.16 | 1.19 | 1.25 | 1.33 | n.d. | 1.21 | 1.23 |
| Fibrinogen (mg/dL)                       | 226  | 171    | 145  | 289  | n.d. | 234  | 265  | 279  | 339  | n.d. | 306  | 286  |

(Continued)

| Day of gastrectomy                         | 38               | 39               | 40               | 41                | 42                | 43               | 44               | 45               | 46               | 47               | 48               | 50               | 51               |
|--------------------------------------------|------------------|------------------|------------------|-------------------|-------------------|------------------|------------------|------------------|------------------|------------------|------------------|------------------|------------------|
| Day of fecal transplantation               | 8                | 9                | 10               | 11                | 12                | 13               | 14               | 15               | 16               | 17               | 18               | 20               | 21               |
| Temperature (°C)                           | 36.0-37.0        | 36.5             | 36.3-37.6        | 36.0-37.4         | 36.7-37.3         | 36.0-37.2        | 36.7-37.0        | 36.1-37.1        | 36.0-36.8        | 36.5-37.2        | 36.3-36.7        | 36.0-36.5        | 36.0-36.8        |
| Heart rate (bpm)                           | 75-87            | 70-83            | 63-85            | 71-88             | 69-90             | 71-86            | 73-84            | 72-92            | 79-92            | 72-91            | 70-94            | 60-83            | 67-82            |
| Respiratory rate (beats/min)               | 14-22            | 13-23            | 16-26            | 13-29             | 13-24             | 16-26            | 14-24            | 16-23            | 15-28            | 17-26            | 14-24            | 12-23            | 16-27            |
| Blood pressure (mmHg)                      | 93-114/<br>54-68 | 99-111/<br>52-79 | 97-111/<br>59-75 | 101-117/<br>63-78 | 102-120/<br>62-77 | 98-121/<br>63-78 | 94-114/<br>58-79 | 92-116/<br>59-79 | 92-113/<br>58-78 | 95-124/<br>61-80 | 95-125/<br>60-88 | 93-123/<br>62-84 | 97-121/<br>63-85 |
| Blood oxygen saturation (%)                | 96-100           | 97-100           | 98-100           | 98-100            | 93-100            | 98-100           | 100              | 94-100           | 98-100           | 99-100           | 95-100           | 97-100           | 96-100           |
| pH                                         | 7.384            | 7.392            | 7.323            | 7.298             | 7.416             | 7.465            | 7.447            | 7.508            | 7.468            | 7.479            | 7.483            | n.d              | 7.453            |
| PaO <sub>2</sub> (mmHg)                    | 116.0            | 126.0            | 118.0            | 134.0             | 75.9              | 89.4             | 122.0            | 73.5             | 89.1             | 54.4             | 147.0            | n.d              | 134.0            |
| PaCO <sub>2</sub> (mmHg)                   | 31.9             | 27.0             | 30.1             | 26.5              | 36.3              | 31.2             | 33.5             | 32.5             | 31.7             | 33.4             | 34.6             | n.d              | 37.0             |
| BE                                         | -5.3             | -10.8            | -9.5             | -12.4             | -0.9              | -0.8             | -0.4             | 2.7              | -0.6             | 1.2              | 2.4              | n.d              | 1.9              |
| Lac (mmol/L)                               | 0.7              | 0.5              | 0.5              | 0.7               | 1.5               | 1.0              | 0.6              | 0.9              | 1.0              | 1.1              | 0.7              | n.d              | 1.0              |
| C-reactive protein (mg/L)                  | 22.50            | 21.30            | 13.39            | 16.80             | 11.60             | 11.43            | n.d              | n.d              | 25.00            | n.d              | 12.62            | n.d              | 15.00            |
| Daily stool volume (mL)                    | 850              | 1675             | 1250             | 950               | 550               | 900              | 280              | 900              | 80               | 50               | 300              | 400              | 270              |
| <b>Hematological analysis</b>              |                  |                  |                  |                   |                   |                  |                  |                  |                  |                  |                  |                  |                  |
| White blood cell count ( $\times 10^9/L$ ) | 5.3              | 4.8              | 6.1              | 5.3               | 4.5               | 4.1              | 4.9              | 4.5              | 3.5              | 4.2              | 4.0              | n.d              | 2.7              |
| Neutrophil percentage (%)                  | 53               | 45               | 46               | 35                | 42                | 35               | 45               | 43               | 30               | 30               | 20               | n.d              | n.d              |
| Lymphocyte percentage (%)                  | 40               | 45               | 41               | 54                | 46                | 56               | 46               | 49               | 59               | 61               | 68               | n.d              | 69               |
| Platelet ( $\times 10^9/L$ )               | 282              | 295              | 354              | 334               | 295               | 252              | 258              | 134              | 161              | 185              | 156              | n.d              | 160              |

| <b>Liver function</b>           |       |       |       |       |       |       |       |       |       |       |       |     |       |
|---------------------------------|-------|-------|-------|-------|-------|-------|-------|-------|-------|-------|-------|-----|-------|
| Total protein (g/L)             | 48.30 | 51.20 | 54.80 | 59.40 | 53.50 | 52.40 | 51.00 | 53.14 | 54.10 | 55.51 | 55.88 | n.d | 49.90 |
| Albumin (g/L)                   | 32.50 | 35.40 | 35.60 | 31.80 | 35.10 | 34.10 | 33.60 | 34.05 | 34.60 | 35.33 | 34.65 | n.d | 31.90 |
| Total bilirubin (µmol/L)        | 11.80 | 13.85 | 12.01 | 11.80 | 12.69 | 14.16 | 12.38 | 12.80 | 12.64 | 14.38 | 14.91 | n.d | 11.69 |
| Direct bilirubin (µmol/L)       | 1.90  | 2.04  | 1.48  | 7.80  | 1.35  | 2.93  | 1.73  | 1.25  | 1.36  | 2.44  | 6.02  | n.d | 4.71  |
| Indirect bilirubin (µmol/L)     | 9.90  | 11.81 | 10.53 | 4.00  | 11.34 | 11.23 | 10.65 | 11.55 | 11.28 | 11.94 | 8.89  | n.d | 6.98  |
| <b>Renal function</b>           |       |       |       |       |       |       |       |       |       |       |       |     |       |
| Creatinine (µmol/L)             | 36.00 | 41.00 | 43.00 | 58.00 | 52.00 | 48.00 | 41.00 | 38.49 | 39.00 | 36.08 | 39.19 | n.d | 33.00 |
| Urea N (mmol/L)                 | 7.10  | 4.80  | 2.50  | 0.90  | 1.80  | 1.10  | 0.90  | 0.83  | 2.10  | 1.46  | 1.86  | n.d | 1.40  |
| Uric acid (µmol/L)              | 111   | 168   | 200   | 224   | 248   | 203   | 157   | 137   | 158   | 145   | 174   | n.d | 147   |
| <b>Blood coagulation test</b>   |       |       |       |       |       |       |       |       |       |       |       |     |       |
| Prothrombin time (s)            | 14.7  | 14.4  | 13.5  | 13.6  | 13.0  | 13.0  | 11.6  | 11.0  | 12.2  | 12.1  | 12.1  | n.d | 13.0  |
| Partial thromboplastin time (s) | 30.1  | 28.5  | 25.6  | 28.2  | 22.5  | 28.5  | 23.8  | 21.4  | 25.7  | 30.5  | 29.2  | n.d | 32.6  |
| International normalized ratio  | 1.28  | 1.25  | 1.17  | 1.18  | 1.13  | 1.13  | 1.01  | 0.96  | 1.06  | 1.05  | 1.05  | n.d | 1.13  |
| Fibrinogen (mg/dL)              | 279   | 265   | 276   | 257   | 265   | 215   | 203   | 145   | 63    | 250   | 220   | n.d | 195   |

Notes: n.d.: no detected.
