# Supplementary material for: Successful treatment of severe sepsis and diarrhea after vagotomy utilizing fecal microbiota transplantation: a case report
Source: Springer Nature journal article supplement (doi:10.1186/s13054-015-0738-7), 2015-01-30
Supplement: MOESM3 [file 9780086]

**Additional file 3 Phylogenetic tree generated from the partial 16S rDNA sequences obtained from the fecal microbiotas.** The sequences were aligned with closely related 16S rDNA sequences retrieved from GenBank database using the Basic Local Alignment Search Tool. The tree was conducted by the sequences of the predominant species in the feces through the *MEGA* software. The scale bar represents the genetic distance.

Streptococcaceae

*Streptococcus infantarius*  
18  
*Streptococcus pasteurianus*  
17  
*Streptococcus gallolyticus*  
12  
*Streptococcus thermophilus*  
25  
*Streptococcus oralis*  
15

Enterococcaceae

*Enterococcus faecalis*  
13

Lactobacillaceae

*Lactobacillus salivarius*  
10  
*Lactobacillus plantarum*  
5  
*Lactobacillus reuteri*  
30

Veillonellaceae

*Veillonella sp.*  
9  
*Veillonella dispar*  
32

Clostridiaceae

*Clostridium ljungdahlii*  
20

Eubacterium

*Ruminococcus champanellensis*  
24

Clostridiaceae

*Clostridium saccharolyticum*  
22

Eubacteriaceae

*Eubacterium eligens*  
11  
*Eubacterium rectale*  
14

Lachnospiraceae

*Roseburia intestinalis*  
16

Moraxellaceae

*Acinetobacter baumannii*  
8

Enterobacteriaceae

*Yersinia enterocolitica*  
26  
*Escherichia coli*  
27  
*Shigella boydii*  
28  
*Citrobacter rodentium*  
1  
*Enterobacter cloacae*  
29  
*Klebsiella pneumoniae*  
19  
*Erwinia billingiae*  
21  
*Raoultella ornithinolytica*  
23  
*Enterobacter sp.*  
31

Bacteroidaceae

*Bacteroides vulgatus*  
2  
*Bacteroides thetaiotaomicron*  
6  
*Bacteroides coprosuis*  
7  
*Bacteroides helcogenes*  
3  
*Bacteroides salanitronis*  
4

**Firmicutes**

**Proteobacteria**

**Bacteroidaceae**
